# Supplementary material for: A Population Pharmacokinetic Model-Guided Evaluation of Ceftolozane-Tazobactam Dosing in Critically Ill Patients Undergoing Continuous Venovenous Hemodiafiltration
Source: PubMed Central journal article supplement (PMC7187594; doi:10.1128/aac.01655-19), 2019-12-20

Supplemental Table 1. Probability of achieving selected tazobactam exposures during the first 24 hours of dosing and at steady state

| Ceftolozane/tazobactam dosing regimen (2:1 ratio) | Probability of tazobactam exposure of 20% $fT_{>1mg/L}$ |                 | Probability of tazobactam exposure of 50% $fT_{>2mg/L}$ |                 | Probability of tazobactam exposure of 100% $fT_{>4mg/L}$ |                 |
|---------------------------------------------------|---------------------------------------------------------|-----------------|---------------------------------------------------------|-----------------|----------------------------------------------------------|-----------------|
|                                                   | First 24 hours                                          | At steady state | First 24 hours                                          | At steady state | First 24 hours                                           | At steady state |
| 0.375 g q8h                                       | 1.0                                                     | 1.0             | 0.1                                                     | 0.8             | 0.0                                                      | 0.0             |
| 0.375 g 4h EI q8h                                 | 1.0                                                     | 1.0             | 0.1                                                     | 1.0             | 0.0                                                      | 0.0             |
| 0.375 g LD + 1.125 g CI                           | 1.0                                                     | 1.0             | 0.5                                                     | 1.0             | 0.0                                                      | 0.0             |
| 0.75 g q8h                                        | 1.0                                                     | 1.0             | 1.0                                                     | 1.0             | 0.0                                                      | 0.0             |
| 0.75 g 4h EI q8h                                  | 1.0                                                     | 1.0             | 1.0                                                     | 1.0             | 0.0                                                      | 0.1             |
| 0.75 g LD + 2.25 g CI                             | 1.0                                                     | 1.0             | 1.0                                                     | 1.0             | 0.0                                                      | 0.7             |
| 1.5 g q8h                                         | 1.0                                                     | 1.0             | 1.0                                                     | 1.0             | 0.0                                                      | 1.0             |
| 1.5 g 4h EI q8h                                   | 1.0                                                     | 1.0             | 1.0                                                     | 1.0             | 0.0                                                      | 1.0             |
| 1.5 g LD + 4.5g CI                                | 1.0                                                     | 1.0             | 1.0                                                     | 1.0             | 0.5                                                      | 1.0             |
| 1.5 g LD for 24h + 0.75 g q8h                     | 1.0                                                     | 1.0             | 1.0                                                     | 1.0             | 0.0                                                      | 0.1             |
| 3.0 g q8h                                         | 1.0                                                     | 1.0             | 1.0                                                     | 1.0             | 0.8                                                      | 1.0             |
| 3.0 g 4h EI q8h                                   | 1.0                                                     | 1.0             | 1.0                                                     | 1.0             | 0.0                                                      | 1.0             |
| 3.0 g LD+ 9.0 g CI                                | 1.0                                                     | 1.0             | 1.0                                                     | 1.0             | 1.0                                                      | 1.0             |
| 3.0 g LD + 0.75 g q8h                             | 1.0                                                     | 1.0             | 1.0                                                     | 1.0             | 0.1                                                      | 0.1             |

q8h, every eight hour intermittent infusion (1hour); EI, extended infusion; %  $fT_{>1mg/L}$  or  $4mg/L$ , percentage of time free drug concentration is above the specified concentration; LD, loading dose over 1 hour; CI, continuous infusion over 24 hours.

Supplemental figure 1. Visual predictive check plots for ceftolozane and tazobactam pre-filter patient plasma concentrations

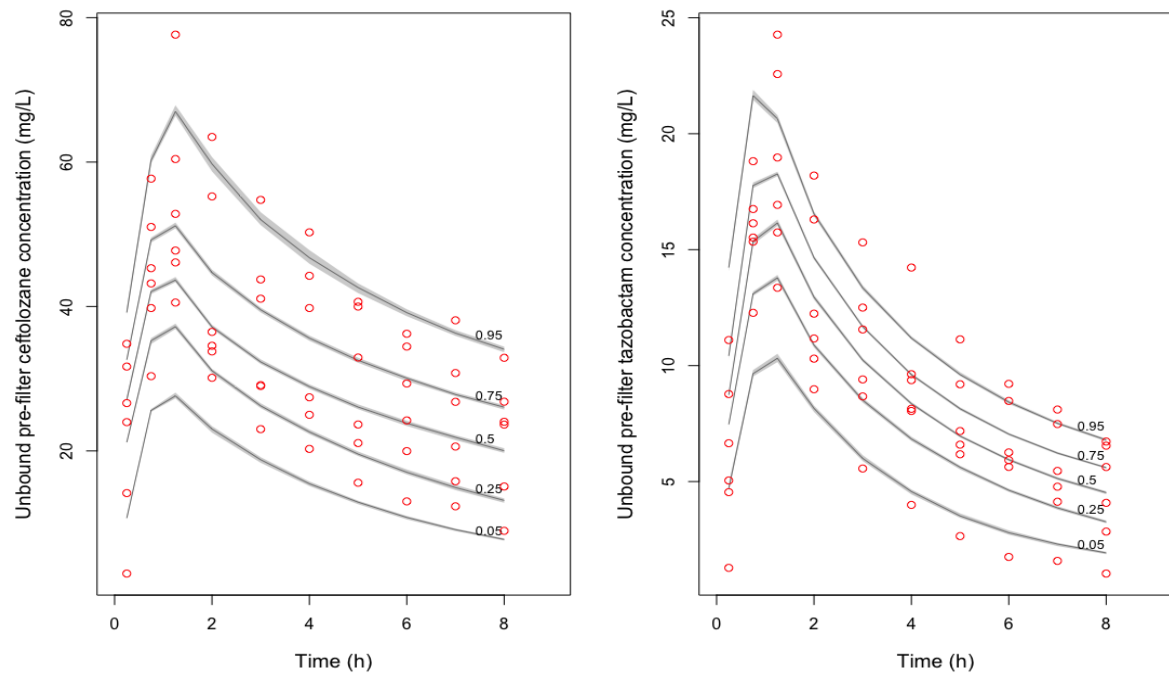

Supplement: AAC.01655-19-s0001.pdf [file AAC.01655-19-s0001.pdf]
